# Supplementary material for: Empowering High School Staff to Respond to Emergencies: A Pilot Training Program for Intranasal Naloxone and Epinephrine Administration
Source: Research Square preprint supplement (doi:10.21203/rs.3.rs-6977727/v1), 2025-09-15
Supplement: Supplementary file 1 [file d1f5ab34e6c8aeb867c6c188.xlsx]

## Sheet: Survey Questions
Question	Answer Options	Correct Answer
Location of training?	—	—
Age?	1 = ≤23	—
	2 = 24-30
	3 = 31-35
	4 = 36-40
	5 = Other
How long have you been teaching high school?	—	—
Have you received training on administration of intranasal naloxone prior to this event?	1 = Yes	—
	2 = No
Have you received training on administration of an epinephrine auto-injector prior to this event?	1 = Yes	—
	2 = No
How confident do you feel in your ability to administer intranasal naloxone?	1 = Not confident at all	—
	2 = Somewhat confident
	3 = Neutral
	4 = Confident
	5 = Very confident
How confident do you feel in your ability to administer epinephrine auto-injector?	1 = Not confident at all	—
	2 = Somewhat confident
	3 = Neutral
	4 = Confident
	5 = Very confident
How comfortable are you with identifying the signs of opioid overdose?	1 = Not comfortable at all	—
	2 = Somewhat comfortable
	3 = Neutral
	4 = Comfortable
	5 = Very comfortable
How comfortable are you with identifying the signs of anaphylaxis?	1 = Not comfortable at all	—
	2 = Somewhat comfortable
	3 = Neutral
	4 = Comfortable
	5 = Very comfortable
Does your school have intranasal naloxone on hand?	1 = Yes	—
	2 = No
	3 = I do not know
Does your school have epinephrine auto-injectors on hand?	1 = Yes	—
	2 = No
	3 = I do not know
How many adolescent fatalities from drug overdoses occur each week on average?	1 = 0	1 = Incorrect
	2 = 5	2 = Incorrect
	3 = 10	3 = Incorrect
	4 = 15	4 = Incorrect
	5 = 20+	5 = Correct
What are the signs of an opioid overdose?	1 = Unresponsiveness	1 = Incorrect
	2 = Shallow, slowed, or stopped breathing	2 = Incorrect
	3 = Pinpoint pupils	3 = Incorrect
	4 = Blue lips or fingernails	4 = Incorrect
	5 = All of the above	5 = Correct
What are the signs of anaphylaxis?	1 = Skin rashes, itching or hives	1 = Incorrect
	2 = Swelling of the lips, tongue or throat	2 = Incorrect
	3 = Dizziness and/or fainting	3 = Incorrect
	4 = Shortness of breath or trouble breathing	4 = Incorrect
	5 = All of the above	5 = Correct
How many children and young adult fatalities occur annually from food allergies?	1 = 25	1 = Incorrect
	2 =50	2 = Incorrect
	3 = 75	3 = Incorrect
	4 = 100	4 = Incorrect
	5 = 150+	5 = Correct
Which of the following is the most appropriate description of intranasal naloxone administration?	1 = Call 911 and perform sternal rub. Provide 3 sprays in each nostril. Spray may be given into the other nostril every 2 to 3 minutes until the patient responds or until emergency medical assitance becomes available.	1 = Incorrect
	2 = Call 911 and perform sternal rub. Provide 1 spray in each nostril. Spray may be given into the other nostril every 2 to 3 minutes until the patient responds or until emergency medical assitance becomes available.	2 = Correct
	3 = Call 911 and perform sternal rub. Provide 1 spray into one nostril. No more sprays may be administered prior to EMS arrival.	3 = Incorrect
	4 = Call 911 and perform sternal rub. Provide 1 spray into one nostril. If this does not improve the persons symptoms, they are not likely having an opiate overdose. Do not administer any more sprays.	4 = Incorrect
What is the primary purpose of administering intranasal naloxone?	1 = To stop an amphetamine overdose	1 = Incorrect
	2 = To stop an opioid overdose	2 = Correct
	3 = To stop an allergic reaction	3 = Incorrect
	4 = To stop a heart attack	4 = Incorrect
	5 = All of the above	5 = Incorrect
Which of the following is the most appropriate description of epinephrine auto-injector administration?	1 = Remove the cap, make sure child is sitting/lying down, press the orange part firmly against the thigh muscle, hold for 10 seconds	1 = Correct
	2 = Remove the cap, make sure child is standing, ensure orange part is facing toward you, push against thigh muscle, hold for 10 seconds	2 = Incorrect
	3 = Remove the cap, make sure child is sitting/lying down, press the orange part firmly against the shoulder muscle, hold for 10 seconds	3 = Incorrect
	4 = Remove the cap, make sure child is sitting/lying down, ensure orange part is facing toward you, push firmly against the thigh muscle, hold for 10 seconds	4 = Incorrect
What is the primary purpose of administering an epinephrine auto-injector?	1 = To stop an amphetamine overdose	1 = Incorrect
	2 = To stop an opioid overdose	2 = Incorrect
	3 = To stop an allergic reaction	3 = Correct
	4 = To stop a heart attack	4 = Incorrect
	5 = All of the above	5 = Incorrect
(—) indicates “not applicable” (demographic or attitude items with no correct answer).
